# Supplementary material for: Hepatic DPP4 DNA Methylation Associates With Fatty Liver
Source: Oxford University Press journal article supplement (doi:10.2337/db15-1716), 2016-10-10

## SUPPLEMENTARY DATA

**Supplementary Figure S1.** DPP4 release from white adipose tissue. (A, B) Correlation of *Dpp4* expression with *ex-vivo* DPP4 release from gonadal (gWAT) (A) and subcutaneous white adipose tissue (scWAT) (B). (C, D) *Ex-vivo* DPP4 release from gWAT (C) and scWAT (D) of low gainers (LG, white bars) and high gainers (HG, black bars) at 13 weeks of age. All data are represented as mean  $\pm$  SEM of 4 animals per group (C, D). Statistical evaluation of correlations is indicated in each graph (n=20 animals) (white circles = 2 h, black circles = 24 h). ns, not significant.

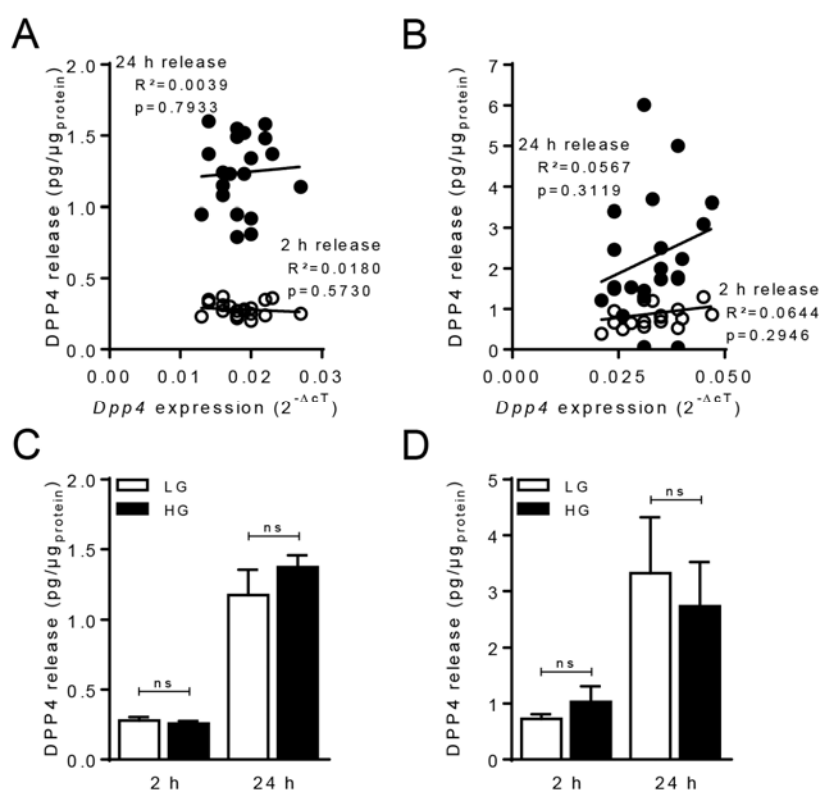

# SUPPLEMENTARY DATA

**Supplementary Figure S2.** Differentially methylated region (DMR) of hepatic *Dpp4*. (A) DMR of hepatic *Dpp4* in low gainer (LG) and high gainer (HG) mice, analyzed by direct bisulfite sequencing PCR (dBSP). (B) Site-specific methylation at CpG<sub>877</sub>, CpG<sub>1204</sub>, CpG<sub>1253</sub> and CpG<sub>1255</sub> in LG and HG mice. All data are represented as mean  $\pm$  SEM of 7-8 animals per group. \* $p < 0.05$  compared to LG group.

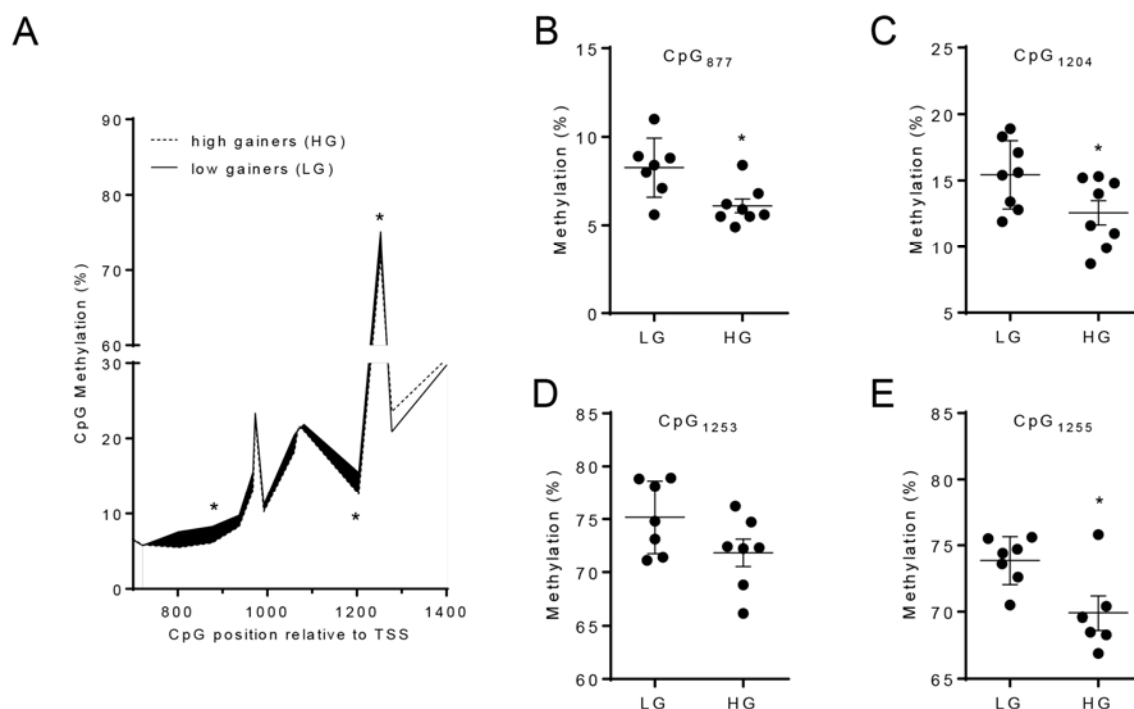

Supplement: db151716supplementarydata.pdf [file db151716supplementarydata.pdf]
